# Supplementary material for: Structure guided design and binding analysis of EGFR inhibiting analogues of erlotinib and AEE788 using ensemble docking, molecular dynamics and MM-GBSA
Source: Royal Society of Chemistry journal article supplement (doi:10.1039/c6ra08517b), 2016-01-01
Supplement: c6ra08517b1.xlsx [file c6ra08517b1.xlsx]

## Sheet: 1M17_2J6M_2ITW
Supplemenatry Table S1: Table describing the corresponding residue numbering for the three structures (1M17, 2J6M and 2ITW) used in this study. Active site residues are highlighted in Yellow.
1M17	2J6M	2ITW
GLY672	-	GLY696
GLU673	GLU697	GLU697
ALA674	ALA698	ALA698
PRO675	PRO699	PRO699
ASN676	ASN700	ASN700
GLN677	GLN701	GLN701
ALA678	ALA702	ALA702
LEU679	LEU703	LEU703
LEU680	LEU704	LEU704
ARG681	ARG705	ARG705
ILE682	ILE706	ILE706
LEU683	LEU707	LEU707
LYS684	LYS708	LYS708
GLU685	GLU709	GLU709
THR686	THR710	THR710
GLU687	GLU711	GLU711
PHE688	PHE712	PHE712
LYS689	LYS713	LYS713
LYS690	LYS714	LYS714
ILE691	ILE715	ILE715
LYS692	LYS716	LYS716
VAL693	VAL717	VAL717
LEU694	LEU718	LEU718
GLY695	GLY719	GLY719
SER696	SER720	SER720
GLY697	GLY721	GLY721
ALA698	ALA722	ALA722
PHE699	PHE723	PHE723
GLY700	GLY724	GLY724
THR701	THR725	THR725
VAL702	VAL726	VAL726
TYR703	TYR727	TYR727
LYS704	LYS728	LYS728
GLY705	GLY729	GLY729
LEU706	LEU730	LEU730
TRP707	TRP731	TRP731
ILE708	ILE732	ILE732
PRO709	PRO733	PRO733
GLU710	GLU734	GLU734
GLY711	GLY735	GLY735
GLU712	GLU736	GLU736
LYS713	LYS737	LYS737
VAL714	VAL738	VAL738
LYS715	LYS739	LYS739
ILE716	ILE740	ILE740
PRO717	PRO741	PRO741
VAL718	VAL742	VAL742
ALA719	ALA743	ALA743
ILE720	ILE744	ILE744
LYS721	LYS745	LYS745
GLU722	GLU746	GLU746
LEU723	LEU747	LEU747
ARG724	ARG748	ARG748
GLU725	GLU749	GLU749
ALA726	ALA750	ALA750
THR727	THR751	THR751
SER728	SER752	SER752
PRO729	PRO753	PRO753
LYS730	LYS754	LYS754
ALA731	ALA755	ALA755
ASN732	ASN756	ASN756
LYS733	LYS757	LYS757
GLU734	GLU758	GLU758
ILE735	ILE759	ILE759
LEU736	LEU760	LEU760
ASP737	ASP761	ASP761
GLU738	GLU762	GLU762
ALA739	ALA763	ALA763
TYR740	TYR764	TYR764
VAL741	VAL765	VAL765
MET742	MET766	MET766
ALA743	ALA767	ALA767
SER744	SER768	SER768
VAL745	VAL769	VAL769
ASP746	ASP770	ASP770
ASN747	ASN771	ASN771
PRO748	PRO772	PRO772
HIS749	HIS773	HIS773
VAL750	VAL774	VAL774
CYS751	CYS775	CYS775
ARG752	ARG776	ARG776
LEU753	LEU777	LEU777
LEU754	LEU778	LEU778
GLY755	GLY779	GLY779
ILE756	ILE780	ILE780
CYS757	CYS781	CYS781
LEU758	LEU782	LEU782
THR759	THR783	THR783
SER760	SER784	SER784
THR761	THR785	THR785
VAL762	VAL786	VAL786
GLN763	GLN787	GLN787
LEU764	LEU788	LEU788
ILE765	ILE789	ILE789
THR766	THR790	THR790
GLN767	GLN791	GLN791
LEU768	LEU792	LEU792
MET769	MET793	MET793
PRO770	PRO794	PRO794
PHE771	PHE795	PHE795
GLY772	GLY796	GLY796
CYS773	CYS797	CYS797
LEU774	LEU798	LEU798
LEU775	LEU799	LEU799
ASP776	ASP800	ASP800
TYR777	TYR801	TYR801
VAL778	VAL802	VAL802
ARG779	ARG803	ARG803
GLU780	GLU804	GLU804
HIS781	HIS805	HIS805
LYS782	LYS806	LYS806
ASP783	ASP807	ASP807
ASN784	ASN808	ASN808
ILE785	ILE809	ILE809
GLY786	GLY810	GLY810
SER787	SER811	SER811
GLN788	GLN812	GLN812
TYR789	TYR813	TYR813
LEU790	LEU814	LEU814
LEU791	LEU815	LEU815
ASN792	ASN816	ASN816
TRP793	TRP817	TRP817
CYS794	CYS818	CYS818
VAL795	VAL819	VAL819
GLN796	GLN820	GLN820
ILE797	ILE821	ILE821
ALA798	ALA822	ALA822
LYS799	LYS823	LYS823
GLY800	GLY824	GLY824
MET801	MET825	MET825
ASN802	ASN826	ASN826
TYR803	TYR827	TYR827
LEU804	LEU828	LEU828
GLU805	GLU829	GLU829
ASP806	ASP830	ASP830
ARG807	ARG831	ARG831
ARG808	ARG832	ARG832
LEU809	LEU833	LEU833
VAL810	VAL834	VAL834
HIS811	HIS835	HIS835
ARG812	ARG836	ARG836
ASP813	ASP837	ASP837
LEU814	LEU838	LEU838
ALA815	ALA839	ALA839
ALA816	ALA840	ALA840
ARG817	ARG841	ARG841
ASN818	ASN842	ASN842
VAL819	VAL843	VAL843
LEU820	LEU844	LEU844
VAL821	VAL845	VAL845
LYS822	LYS846	LYS846
THR823	THR847	THR847
PRO824	PRO848	PRO848
GLN825	GLN849	GLN849
HIS826	HIS850	HIS850
VAL827	VAL851	VAL851
LYS828	LYS852	LYS852
ILE829	ILE853	ILE853
THR830	THR854	THR854
ASP831	ASP855	ASP855
PHE832	PHE856	PHE856
GLY833	GLY857	GLY857
LEU834	LEU858	LEU858
ALA835	ALA859	ALA859
LYS836	LYS860	LYS860
LEU837	LEU861	LEU861
LEU838	LEU862	LEU862
GLY839	GLY863	GLY863
ALA840	ALA864	ALA864
GLU841	GLU865	GLU865
GLU842	GLU866	GLU866
LYS843	LYS867	LYS867
GLU844	GLU868	GLU868
TYR845	TYR869	TYR869
HIS846	HIS870	HIS870
ALA847	ALA871	ALA871
GLU848	GLU872	GLU872
GLY849	GLY873	GLY873
GLY850	GLY874	GLY874
LYS851	LYS875	LYS875
VAL852	VAL876	VAL876
PRO853	PRO877	PRO877
ILE854	ILE878	ILE878
LYS855	LYS879	LYS879
TRP856	TRP880	TRP880
MET857	MET881	MET881
ALA858	ALA882	ALA882
LEU859	LEU883	LEU883
GLU860	GLU884	GLU884
SER861	SER885	SER885
ILE862	ILE886	ILE886
LEU863	LEU887	LEU887
HIS864	HIS888	HIS888
ARG865	ARG889	ARG889
ILE866	ILE890	ILE890
TYR867	TYR891	TYR891
THR868	THR892	THR892
HIS869	HIS893	HIS893
GLN870	GLN894	GLN894
SER871	SER895	SER895
ASP872	ASP896	ASP896
VAL873	VAL897	VAL897
TRP874	TRP898	TRP898
SER875	SER899	SER899
TYR876	TYR900	TYR900
GLY877	GLY901	GLY901
VAL878	VAL902	VAL902
THR879	THR903	THR903
VAL880	VAL904	VAL904
TRP881	TRP905	TRP905
GLU882	GLU906	GLU906
LEU883	LEU907	LEU907
MET884	MET908	MET908
THR885	THR909	THR909
PHE886	PHE910	PHE910
GLY887	GLY911	GLY911
SER888	SER912	SER912
LYS889	LYS913	LYS913
PRO890	PRO914	PRO914
TYR891	TYR915	TYR915
ASP892	ASP916	ASP916
GLY893	GLY917	GLY917
ILE894	ILE918	ILE918
PRO895	PRO919	PRO919
ALA896	ALA920	ALA920
SER897	SER921	SER921
GLU898	GLU922	GLU922
ILE899	ILE923	ILE923
SER900	SER924	SER924
SER901	SER925	SER925
ILE902	ILE926	ILE926
LEU903	LEU927	LEU927
GLU904	GLU928	GLU928
LYS905	LYS929	LYS929
GLY906	GLY930	GLY930
GLU907	GLU931	GLU931
ARG908	ARG932	ARG932
LEU909	LEU933	LEU933
PRO910	PRO934	PRO934
GLN911	GLN935	GLN935
PRO912	PRO936	PRO936
PRO913	PRO937	PRO937
ILE914	ILE938	ILE938
CYS915	CYS939	CYS939
THR916	THR940	THR940
ILE917	ILE941	ILE941
ASP918	ASP942	ASP942
VAL919	VAL943	VAL943
TYR920	TYR944	TYR944
MET921	MET945	MET945
ILE922	ILE946	ILE946
MET923	MET947	MET947
VAL924	VAL948	VAL948
LYS925	LYS949	LYS949
CYS926	CYS950	CYS950
TRP927	TRP951	TRP951
MET928	MET952	MET952
ILE929	ILE953	ILE953
ASP930	ASP954	ASP954
ALA931	ALA955	ALA955
ASP932	ASP956	ASP956
SER933	SER957	SER957
ARG934	ARG958	ARG958
PRO935	PRO959	PRO959
LYS936	LYS960	LYS960
PHE937	PHE961	PHE961
ARG938	ARG962	ARG962
GLU939	GLU963	GLU963
LEU940	LEU964	LEU964
ILE941	ILE965	ILE965
ILE942	ILE966	ILE966
GLU943	GLU967	GLU967
PHE944	PHE968	PHE968
SER945	SER969	SER969
LYS946	LYS970	LYS970
MET947	MET971	MET971
ALA948	ALA972	ALA972
ARG949	ARG973	ARG973
ASP950	ASP974	ASP974
PRO951	PRO975	PRO975
GLN952	GLN976	GLN976
ARG953	ARG977	ARG977
TYR954	TYR978	TYR978
LEU955	LEU979	LEU979
VAL956	VAL980	VAL980
ILE957	ILE981	ILE981
GLN958	GLN982	GLN982
GLY959	GLY983	GLY983
ASP960	ASP984	ASP984
GLU961
ARG962
MET963
HIS964
